# Supplementary material for: Synthesis of superior dispersions of reduced graphene oxide
Source: Royal Society of Chemistry journal article supplement (doi:10.1039/c3nj00304c), 2013-01-01
Supplement: c3nj00304c.pdf [file c3nj00304c.pdf]

## Electronic supplementary information

### Synthesis of superior dispersions of reduced graphene oxide

Caibao Chen, Jing Li, Run Li, Guyu Xiao\*, Deyue Yan

*School of Chemistry and Chemical Engineering, State Key Laboratory of Metal Matrix Composites, Shanghai Jiao Tong University, 800 Dongchuan Road, Shanghai 200240, PR China*

#### 1. Preparation of graphite oxide

Graphite oxide was prepared by oxidation of natural flake graphite according to the modified Hummers method.<sup>1,2</sup> Firstly, flake graphite (10 g) was put into the mixture of concentrated H<sub>2</sub>SO<sub>4</sub> (25 mL), K<sub>2</sub>S<sub>2</sub>O<sub>8</sub> (5 g) and P<sub>2</sub>O<sub>5</sub> (5 g). The mixture was held at 80°C for 6 h with continuous stirring and then cooled down to room temperature. Subsequently, the mixture was carefully diluted with deionized water, filtered and washed with copious amount of deionized water until the pH of washing water is neutral. This pre-oxidized graphite powder was air-dried at room temperature overnight. Secondly, the pre-oxidized graphite powder was transferred to concentrated H<sub>2</sub>SO<sub>4</sub> (230 mL) with vigorous agitation in an ice bath. KMnO<sub>4</sub> (30 g) was gradually added over a period of 45 min to maintain the mixture temperature below 10°C. The mixture was then stirred at 35°C for 2 h. After that, deionized water (460 mL) was added, and the mixture was stirred for another 15 min. Finally, 1.4 L of deionized water was poured into, followed by slowly adding 30% H<sub>2</sub>O<sub>2</sub> solution (25 mL) to terminate the reaction. The color of the mixture changed from brown into bright yellow. The as-made product was filtered and washed with 1:10 HCl solution (2.5 L). The resulting solid was suspended in deionized water to make a viscous and brown dispersion, and further purified by dialysis for two weeks to remove remaining metal ions and acid. The dark brown graphite oxide powder was obtained by filtering and drying under vacuum at 40°C for 48 h.

The graphene oxide dispersion could be obtained by sonication of the as-made graphite oxide powder in deionized water, which was stable over 6 months.

#### 2. Measurement of the dispersibility of rGO

Because small water content within rGO samples is significant for their dispersion in solvents,<sup>3,4</sup> the rGO filter cakes were used the samples for determining the

---

\* Corresponding author. E-mail: gyxiao@sjtu.edu.cn; Tel.: + 86 21 54742664

dispersibility. The experimental procedure is as follows. A certain amount of the as-made rGO was added to 4 mL solvent and sonicated for a given time. If it was well dispersed, a more amount of rGO was added to another 4 mL solvent and sonicated for the same time. Similar operation was repeated until the maximal re-dispersible amount of rGO was obtained. In addition, the percent of the dry rGO in the as-made rGO (filter cake) was obtained by measuring the rGO weight before and after drying at 50°C for 24 h. Thus the dispersibility of the dry rGO could be deduced.

### References

1. W. S. Hummers, R. E. Offeman, *J. Am. Chem. Soc.*, 1958, **80**, 1339–1339.
2. N. I. Kovtyukhova, P. J. Ollivier, B. R. Martin, T. E. Mallouk, S. A. Chizhik, E. V. Buzaneva, A. D. Gorchinskiy, *Chem. Mater.*, 1999, **11**, 771–778.
3. Y. Wang, Z. Shi, J. Yin, *ACS Appl. Mater. Inter.*, 2011, **3**, 1127–1133.
- S. J. Park, J. H. An, I. Jung, R. D. Piner, S. J. An, X. S. Li, A. Velamakanni and R. S. Ruoff, *Nano Lett.*, 2009, **9**, 1593–1597.
